# Supplementary material for: A vertical-oriented WS2nanosheet sensitized by graphene: an advanced electrocatalyst for hydrogen evolution reaction
Source: Royal Society of Chemistry journal article supplement (doi:10.1039/c5nr03704b), 2015-01-01
Supplement: c5nr03704b1.pdf [file c5nr03704b1.pdf]

## Supporting Information

### Vertical-oriented WS<sub>2</sub> Nanosheet Sensitized by Graphene: An Advanced Electrocatalyst for Hydrogen Evolution Reaction

Tofik Ahmed Shifa<sup>a,b,†</sup>, Fengmei Wang<sup>a,b,†</sup>, Zhongzhou Cheng<sup>a</sup>, Xueying Zhan<sup>a</sup>, Zhenxing Wang<sup>a</sup>, Kaili Liu<sup>a,b</sup>, Muhammad Safdar<sup>a</sup>, Lianfeng Sun<sup>a\*</sup> and Jun He<sup>a\*</sup>

<sup>a</sup>CAS Key Laboratory of Nanosystem and Hierarchical Fabrication, National Center for Nanoscience and Technology, No.11 ZhongGuanCunBeiYiTiao, 100190 Beijing, P.R. China, Email: [hej@nanoctr.cn](mailto:hej@nanoctr.cn); [slf@nanoctr.cn](mailto:slf@nanoctr.cn).

<sup>b</sup>T. Shifa, F. Wang, K. Liu, University of Chinese Academy of Science, No.19A Yuquan Road, Beijing 100049, China

<sup>†</sup> These authors contributed equally to this work

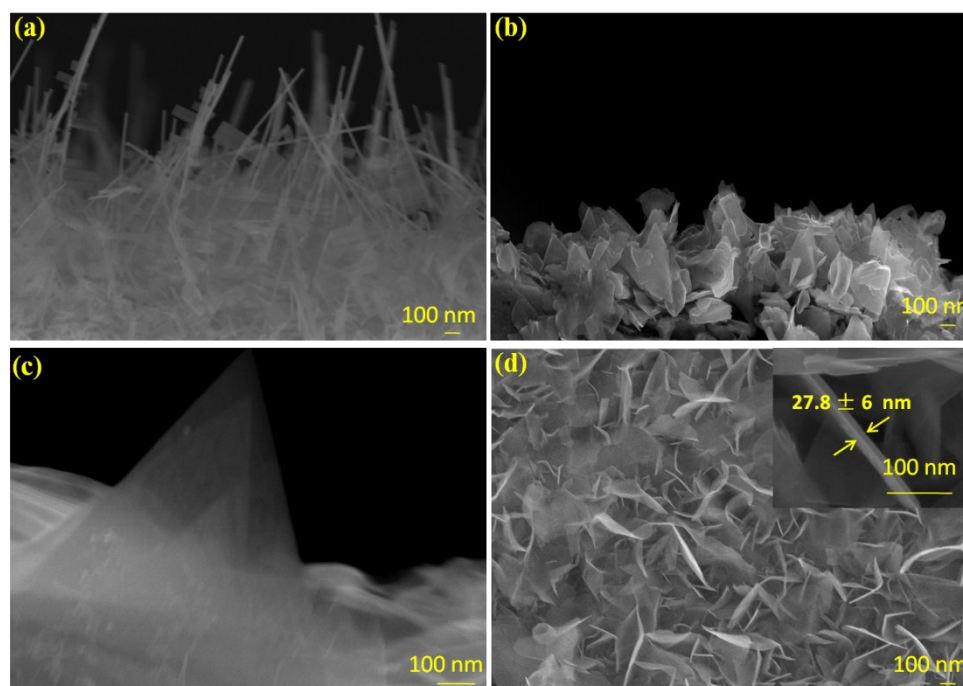

Fig. S1. SEM images side view for (a) WO<sub>3</sub> (b) rGO/ WS<sub>2</sub>, (c) magnified for rGO/ WS<sub>2</sub> and (d) top view for rGO/ WS<sub>2</sub>

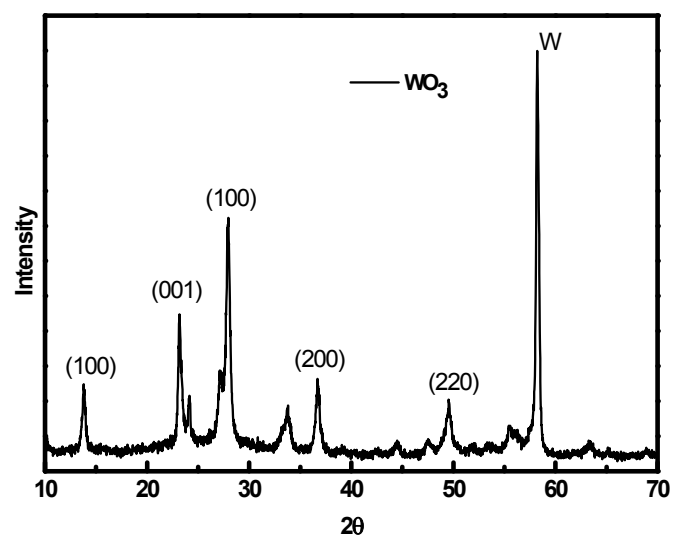

**Fig. S2.** XRD pattern of  $\text{WO}_3$

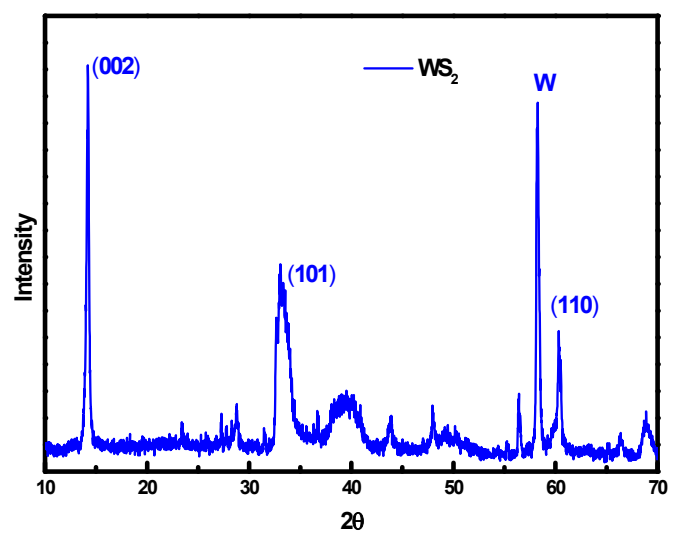

**Fig. S3.** XRD pattern of  $\text{WS}_2$

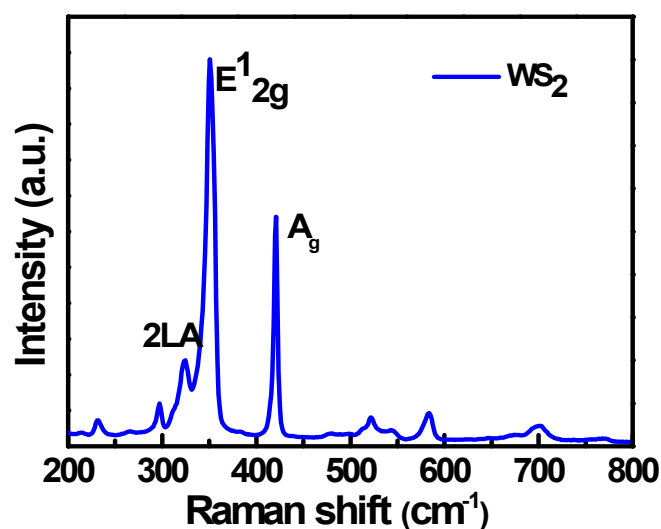

Fig. S4. Raman spectra of WS<sub>2</sub>.

#### Preparation of Reduced Graphene Oxide (rGO).

Graphene oxide was prepared by modified Hummer's method<sup>1</sup>. Briefly, in 500mL Beaker, 200 mg of graphite powder, 100 mg of sodium nitrate, and ~5 mL of concentrated H<sub>2</sub>SO<sub>4</sub> were mixed and cooled to 0°C in an ice-bath. KMnO<sub>4</sub> (600 mg) was added in a stepwise manner to the cooled solution under vigorous stirring keeping the temperature below 20 °C. After the complete addition of KMnO<sub>4</sub>, the temperature of the solution was raised to 35 °C and kept there for half an hour. Then, 10 mL of water was added to the brownish gray paste, and the temperature of the solution rose to 98°C. This temperature was maintained for 15 min, and then the whole solution was diluted further with 30 mL of water and treated with 30% hydrogen peroxide to reduce the residual permanganate and manganese dioxide to colorless soluble manganese sulfate. The light yellow suspension was thoroughly washed with water, air dried and dissolved in distilled water before sonication for 30 min to give ~1 mg/mL GO. The obtained GO was reduced to rGO by treating with 0.5 mL hydrazine hydrate solution<sup>2</sup> and heating at ~70–80°C for 2 h.

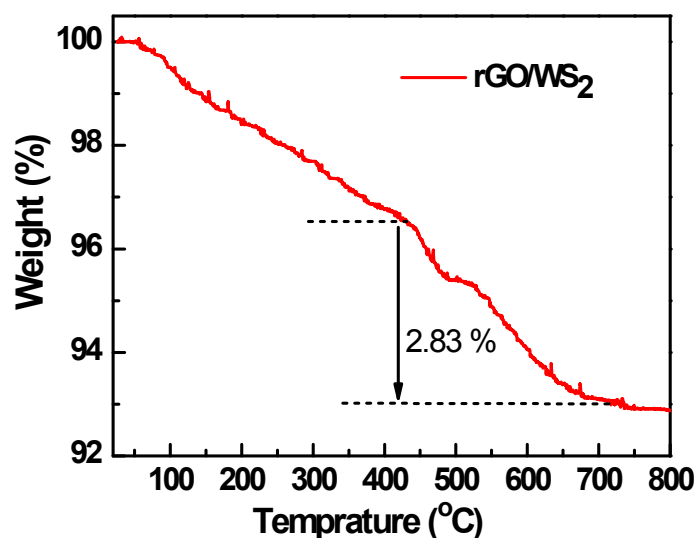

**Fig. S5.** TGA curve of the rGO/ WS<sub>2</sub> nanosheet made to estimate the composition of the material and its thermal stability thereof, scraped from a 0.52 cm<sup>2</sup> area of the W foil. The steady weight loss in the temperature around 400 °C is due to the thermal decomposition of the oxygen functional groups in rGO and the formation of CO, CO<sub>2</sub>, H<sub>2</sub>O and C. From the weight loss difference in the TGA curve, the percentage composition of rGO is approximately found to be 2.83%.,

### iR-correction

For the sake of accurate comparison of the performances of the catalysts, we corrected the polarization curves for the Ohmic losses. This is made by subtracting the potential loss due to the Rs from the raw potential data following the Ohms's law. The Rs used in this calculation is obtained from the EIS Nyquist plot as the first intercept of the main arc with the real axis. Accordingly, the Rs of samples WS<sub>2</sub> and rGO/WS<sub>2</sub> were 1.29Ω and 0.98Ω respectively.

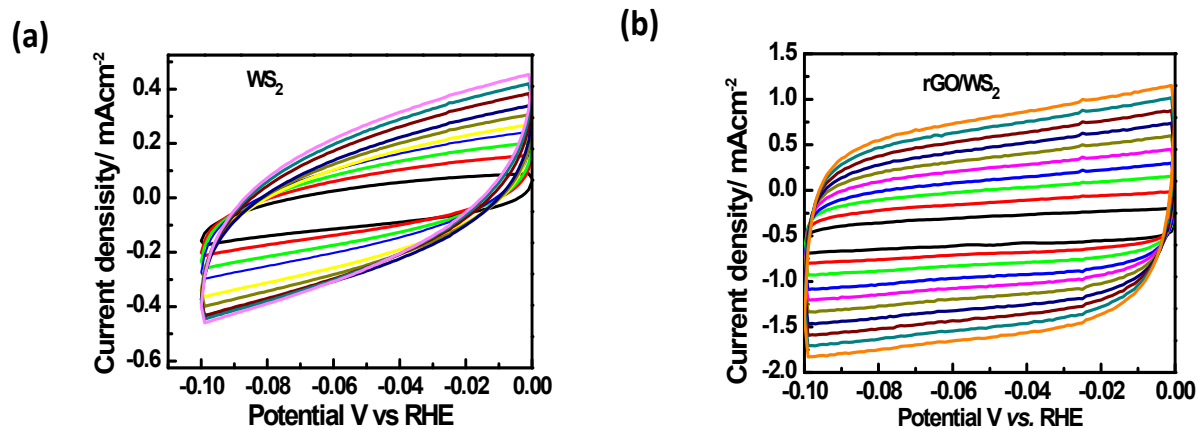

**Fig. S5** Voltamograms at various scan rates for estimation of  $C_{dl}$  of WS<sub>2</sub> (a) and rGO/WS<sub>2</sub>(b)

#### References

1. W. S. Hummers and R. E. Offeman, *J. Am. Chem. Soc.*, 1958, **80**, 1339-1339.
2. S. K. Bhunia and N. R. Jana, *ACS Appl. Mater. interfaces*, 2014, **6**, 20085-20092.
